# Supplementary material for: Lysophosphatidic Acid Is a Proinflammatory Stimulus of Renal Tubular Epithelial Cells
Source: MDPI journal article supplement (doi:10.3390/ijms23137452), 2022-07-05
Supplement: s1 [file s1]

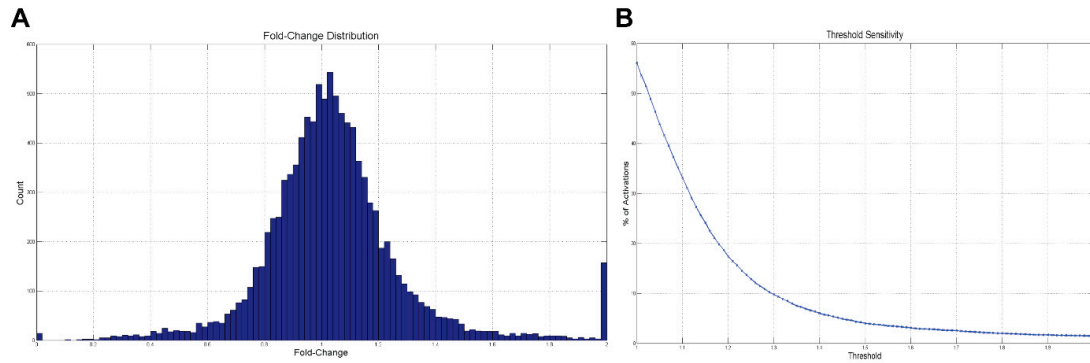

**Figure S1. Active signal threshold selection.** Related to Figures 2 and 3. **A.** Distribution of the fold changes (ratio of the fluorescence at the stimulated versus the unstimulated state) for all signals. The median of responses upon stimulation with medium was considered as the unstimulated state fluorescence value. **B.** Sensitivity analysis on the effect of the fold change threshold on the dataset. At low thresholds, slight changes in the threshold greatly affect the number of activations (percentage of fold change values exceeding the threshold), whereas at higher thresholds the dataset is rather insensitive to changes of the threshold. Activation threshold was selected as the fold change value in which the dataset was adequately insensitive accompanied by enough activations for downstream analysis.

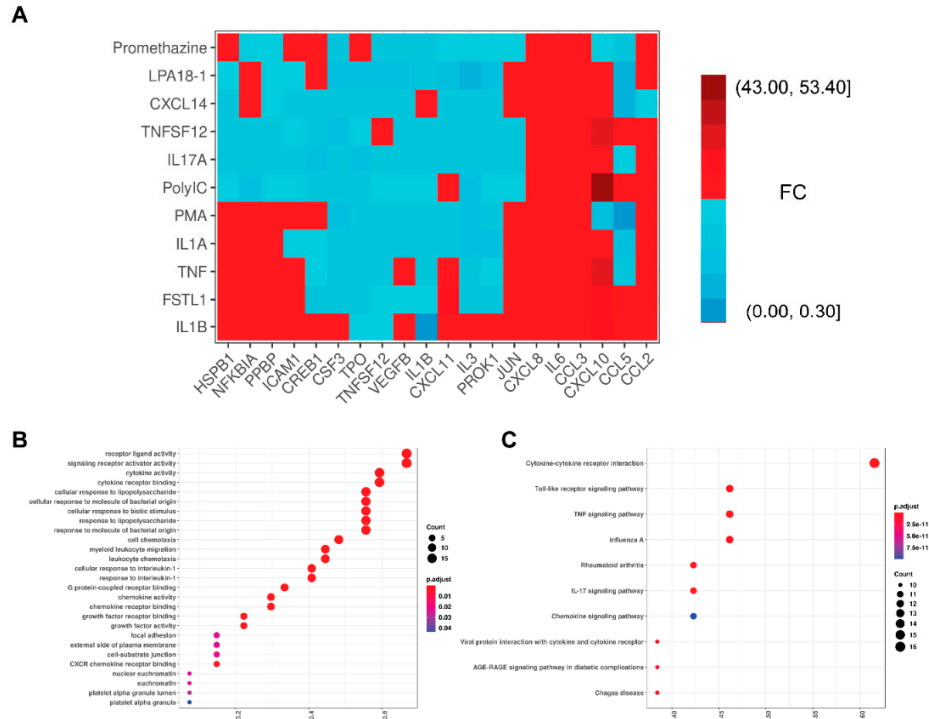

**Figure S2. LPA clusters with proinflammatory stimuli.** Related to Figure 6. **A.** Cluster 2 heatmap. Signals with no response in the cluster were filtered out. **B, C.** Over-representation analysis of cluster 2 signals and responses using GO and KEGG as background database, respectively, suggest that cluster 2 comprises of proinflammatory molecules. Signals and responses with no intra-cluster effect/response were not considered during pathway analyses. Top 10 enriched terms of each GO semantic category (Molecular Function, Biological Process and Cellular Component) and KEGG database are shown.

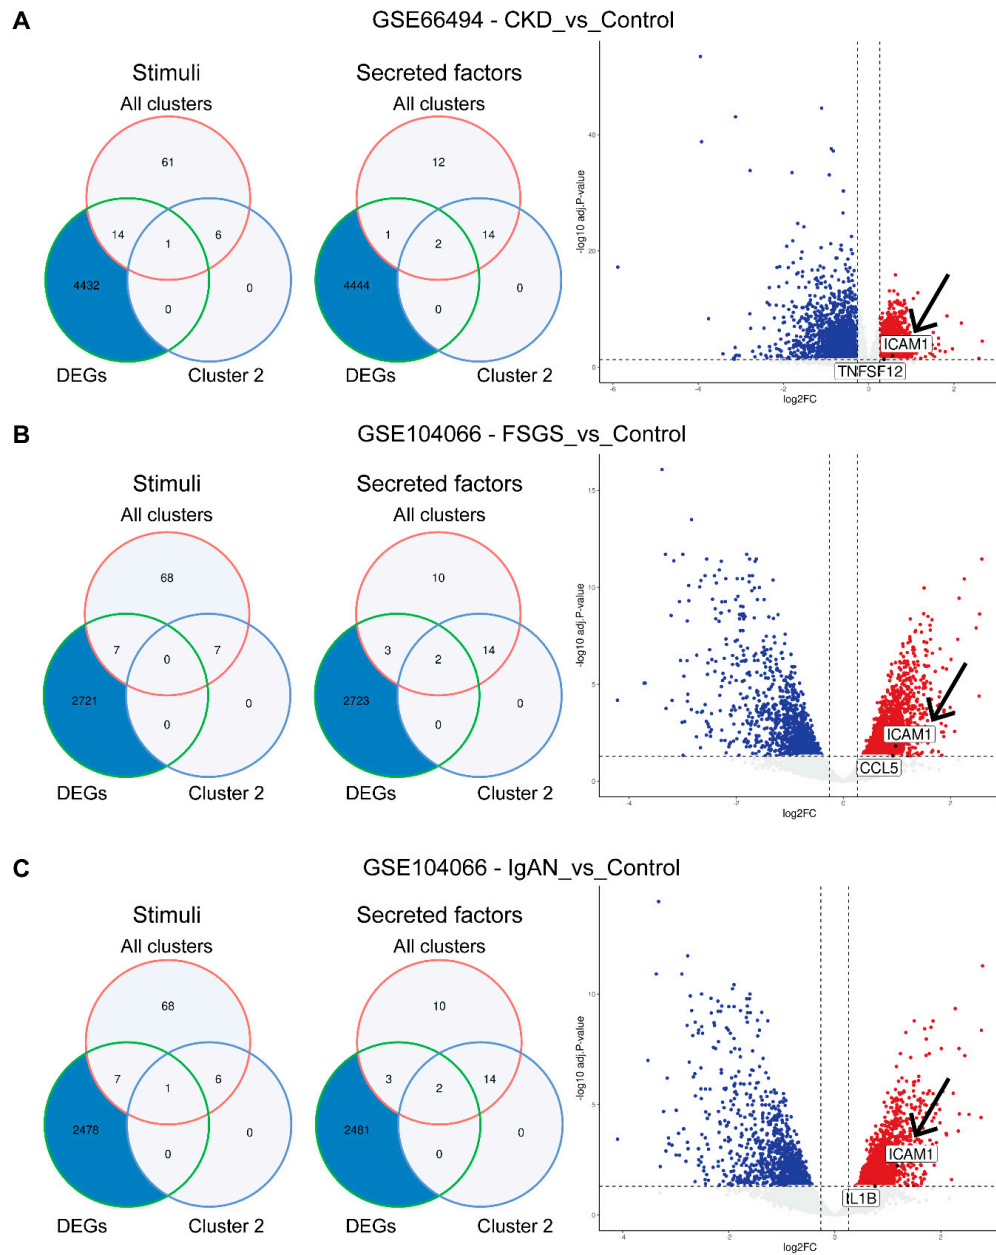

**Figure S3. Expression of cluster 2 targets upon kidney disease.** Related to Figure 6. Reanalysis of two microarray datasets including three kidney pathological phenotypes and control samples. Dataset GSE66494 in **A** and dataset GSE104066 in **B**. Venn diagrams depict the inter-section of differentially expressed genes (DEGs) ( $|\text{FC}| \geq 1.2$ ), Adjusted  $p\text{-value} < 0.05$ ) of each comparison with active ELISA stimuli and responders (secreted factors). Intersected DEGs are labeled at the volcano plots. Arrows indicate the molecules responding to LPA. TNFSF12 and IL1B1 are both cluster 2 stimuli and responders. CKD, Chronic Kidney Disease; FGS, Focal Segmental GlomeruloSclerosis; IgAN, Immunoglobulin A Nephropathy.

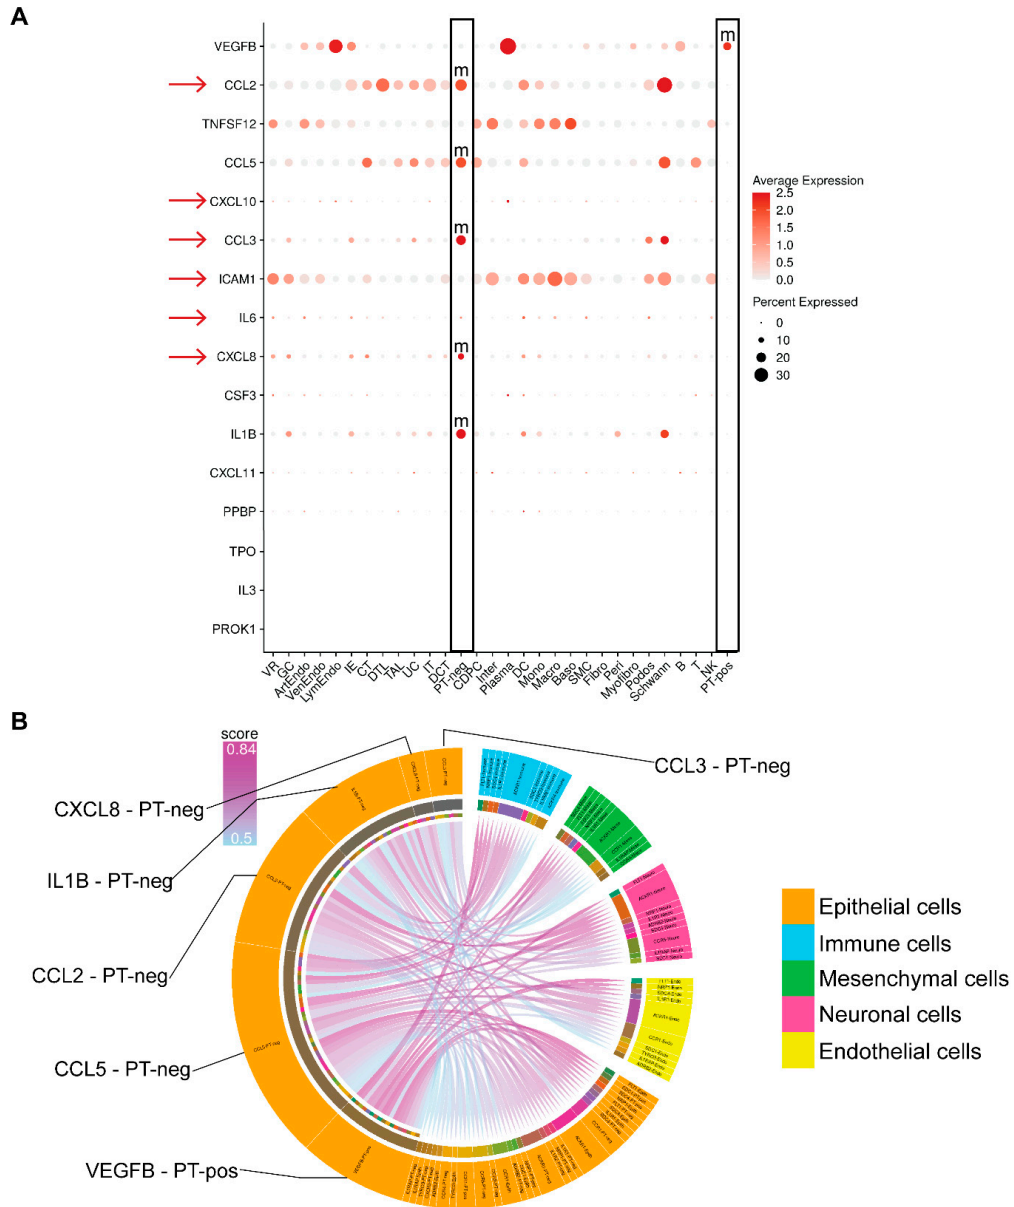

**Figure S4. Cell specificity of cluster 2-induced biological factors and their cell targets.** Related to Figure 6. **A. Dot Plot of cluster 2 responders.** Marker genes of PT-pos (CD10<sup>+</sup>) and PT-neg (CD10<sup>-</sup>) cells are annotated with the letter m. LPA responding features are pinpointed with a red arrow. TPO, IL3 and PROK1 were not detected at the single cell level. Markers are discovered using a Wilcoxon rank-sum test ( $FC \geq 1.2$ , adjusted p-value  $< 0.05$ ). **B. Ligand-receptor (cell-to-cell) analysis of proximal tubule marker ligands.** Interactions depicted are focused on cluster 2 responders secreted from and marking proximal tubule cells. The analysis was performed on cells of both phenotypes. Circos plot segments are named after the respective feature (ligand/receptor) and cell type/population name. *PT*: Proximal Tubule cells.

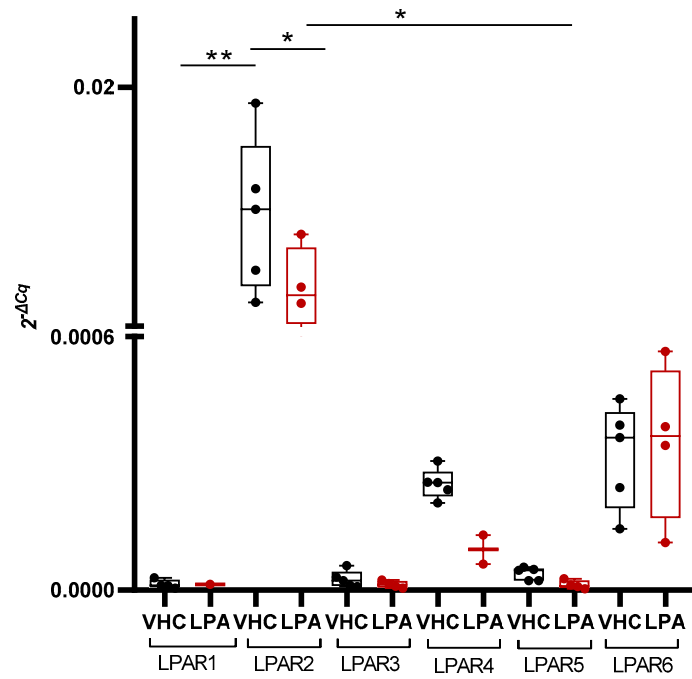

**Figure S5. Endogenous gene expression levels of LPA receptors (LPARs) in HKC-8 cells.** Related to Figure 7. Cells were stimulated with LPA 18:1 or the equivalent volume of chloroform (Vhc), RNA was extracted and reverse transcribed. LPAR levels were quantified with RT-qPCR, normalized with *B2M* and compared using the  $2^{-\Delta Cq}$  values. Statistical analysis was done with Kruskal-Wallis test. \* $p < 0.05$ , \*\* $p < 0.01$ .

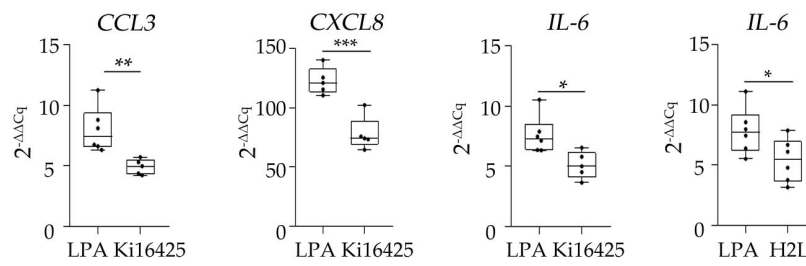

**Figure S6. LPARs mediating LPA signaling.** Related to Figure 8. HKC-8 cells were pretreated for 1 hour with LPAR1/3 inhibitor (Ki16425) 10 $\mu$ M or LPAR2 inhibitor (H2L5186303) 10 $\mu$ M and then treated with LPA at a final concentration of 10  $\mu$ M for four hours. Statistical analysis was performed with unpaired t-test or Welch's test in the case of normal data and with Mann-Whitney in the case of non-normal data. \* $p < 0.05$ , \*\* $p < 0.01$ , \*\*\* $p < 0.001$ .

**Table S1.** Related to Figures 2 & 3. Stimuli of HKC-8 cells. Supplier, catalogue number and target concentration are provided.

| Supplier  | Stimulus                | Cat Number  | Target C (ng/ml) |
|-----------|-------------------------|-------------|------------------|
| InvivoGen | Pam3CSK4                | tlrl-kit1hw | 1000             |
| InvivoGen | Poly(I:C) HMW           | tlrl-kit1hw | 10000            |
| InvivoGen | LPS-EK standard         | tlrl-kit1hw | 10000            |
| InvivoGen | FLA-ST standard         | tlrl-kit1hw | 1000             |
| InvivoGen | FSL1                    | tlrl-kit1hw | 1000             |
| InvivoGen | Imiquimod               | tlrl-kit1hw | 1000             |
| InvivoGen | ssRNA40/LyoVec          | tlrl-kit1hw | 1000             |
| InvivoGen | C12-iE-DAP              | tlrl-nodkit | 1000             |
| InvivoGen | MDP                     | tlrl-nodkit | 10000            |
| InvivoGen | Tri-DAP                 | tlrl-nodkit | 10000            |
| PeproTech | IL17A                   | 200-17      | 100              |
| PeproTech | NT-3                    | 450-03      | 200              |
| PeproTech | NT-4                    | 450-04      | 100              |
| PeproTech | SCF                     | 300-07      | 100              |
| PeproTech | SCGF-A                  | 100-22A     | 500              |
| PeproTech | SFAS ligand             | 310-03H     | 10               |
| PeproTech | Soluble RANK ligand     | 310-01      | 100              |
| PeproTech | TGFB1                   | 100-21      | 10               |
| PeproTech | TGFB2                   | 100-35B     | 10               |
| PeproTech | TGFB3                   | 100-36E     | 10               |
| PeproTech | VCAM-1                  | 150-04      | 100              |
| PeproTech | VEGF 121                | 100-20A     | 100              |
| PeproTech | WISP-3                  | 120-20      | 150              |
| PeproTech | ANG-1                   | 130-06      | 250              |
| PeproTech | ANG-2                   | 130-07      | 500              |
| PeproTech | GMF-beta                | 450-37      | 100              |
| PeproTech | CCL2                    | 300-04      | 200              |
| PeproTech | CCL3                    | 300-08      | 200              |
| PeproTech | CCL4                    | 300-09      | 1000             |
| PeproTech | CCL5                    | 300-06      | 500              |
| PeproTech | SDF-1A                  | 300-28A     | 200              |
| PeproTech | SDF-1B                  | 300-28B     | 200              |
| PeproTech | GM-CSF                  | 300-03      | 20               |
| PeproTech | IFN-G                   | 300-02      | 100              |
| PeproTech | IL-1A                   | 200-01A     | 50               |
| PeproTech | IL-1B                   | 200-01B     | 50               |
| PeproTech | IL-10                   | 200-10      | 10               |
| PeproTech | Human EGF (Animal Free) | AF-100-15   | 100              |

|           |                   |          |      |
|-----------|-------------------|----------|------|
| PeproTech | Beta-NGF          | 450-01   | 50   |
| PeproTech | Activin A         | 120-14   | 100  |
| PeproTech | DKK-1             | 120-30   | 100  |
| PeproTech | IFN beta          | 300-02BC | 50   |
| PeproTech | IL-12             | 200-12   | 50   |
| PeproTech | IL17F             | 200-25   | 100  |
| PeproTech | IL22              | 200-22   | 200  |
| PeproTech | IL23              | 200-23   | 100  |
| PeproTech | PDGF-AA           | 100-13A  | 50   |
| PeproTech | PDGF-AB           | 100-00AB | 100  |
| PeproTech | PDGF-BB           | 100-14B  | 50   |
| PeproTech | IL16 (121)        | 200-16A  | 100  |
| PeproTech | IL6               | 200-06   | 100  |
| PeproTech | TNFA              | 300-01A  | 100  |
| PeproTech | IL-13             | 200-13   | 100  |
| PeproTech | CXCL14/BRAK       | 300-50   | 200  |
| PeproTech | CCL4L1/LAG1       | 300-58   | 200  |
| PeproTech | CCL3L1/LD78B      | 300-56   | 200  |
| PeproTech | CCL28/MEC         | 300-57   | 50   |
| PeproTech | CCL19/MIP3B       | 300-29B  | 500  |
| PeproTech | Amphiregulin (98) | 100-55B  | 100  |
| PeproTech | BMP-13/CDMP-2     | 120-04   | 300  |
| PeproTech | BMP-3             | 120-24B  | 100  |
| PeproTech | CTGF              | 120-19   | 50   |
| PeproTech | CTGFL/WISP-2      | 120-16   | 50   |
| PeproTech | CYR61             | 120-25   | 200  |
| PeproTech | EG-VEGF           | 100-44   | 100  |
| PeproTech | Endostatin        | 150-01   | 1000 |
| PeproTech | Epigen            | 100-51   | 400  |
| PeproTech | FGF-10            | 100-26   | 500  |
| PeproTech | FGF-16            | 100-29   | 100  |
| PeproTech | FGF-17            | 100-27   | 100  |
| PeproTech | FGF-18            | 100-28   | 100  |
| PeproTech | FGF-21            | 100-42   | 10   |
| PeproTech | FGF-23            | 100-52   | 50   |
| PeproTech | FGF-4             | 100-31   | 100  |
| PeproTech | FGF-5             | 100-34   | 50   |
| PeproTech | FGF-6             | 100-30   | 250  |
| PeproTech | FGF-8             | 100-25   | 100  |
| PeproTech | FGF-9             | 100-23   | 100  |
| PeproTech | FGF-acidic        | 100-17A  | 100  |



|           |                |          |     |
|-----------|----------------|----------|-----|
| PeproTech | Galectin-1     | 450-39   | 100 |
| PeproTech | Galectin-3     | 450-38   | 20  |
| PeproTech | GDF-11         | 120-11   | 10  |
| PeproTech | IL4            | 200-04   | 100 |
| PeproTech | HGF            | 100-39   | 50  |
| PeproTech | BDNF           | 450-02   | 50  |
| PeproTech | Klotho         | 100-53   | 50  |
| PeproTech | NOGGIN         | 120-10C  | 200 |
| PeproTech | OPG            | 450-14   | 10  |
| PeproTech | PDGF-CC        | 100-00CC | 125 |
| PeproTech | PEDF           | 130-13   | 200 |
| PeproTech | sCD100         | 310-29   | 50  |
| PeproTech | sCD14          | 110-01   | 130 |
| PeproTech | sCD40 ligand   | 310-02   | 500 |
| PeproTech | SDLL-1         | 140-08   | 500 |
| PeproTech | SDLL-4         | 140-07   | 500 |
| PeproTech | SFRP-1         | 120-29   | 100 |
| PeproTech | Sonic HedgeJog | 100-45   | 200 |
| PeproTech | SPARC          | 120-36   | 100 |
| PeproTech | TGFA           | 100-16A  | 200 |
| PeproTech | CNTF           | 450-13   | 200 |
| PeproTech | GDNF           | 450-10   | 200 |
| PeproTech | TRAIL          | 300-59   | 100 |
| PeproTech | TWEAK          | 310-06   | 100 |
| PeproTech | VEGF 165       | 100-20   | 100 |
| PeproTech | VEGF-B         | 100-20B  | 100 |
| PeproTech | Visfatin       | 130-09   | 250 |
| PeproTech | WISP-1         | 120-18   | 200 |
| PeproTech | WNT-7A         | 120-31   | 25  |
| PeproTech | HB-EGF         | 100-47   | 50  |
| PeproTech | IGF-BP2        | 350-06B  | 500 |
| PeproTech | IGF-BP4        | 350-05B  | 100 |
| PeproTech | IGF-BP5        | 100-05   | 100 |
| PeproTech | IGF-BP7        | 350-09   | 30  |
| PeproTech | IGF-II         | 100-12   | 100 |
| PeproTech | CDNF           | 450-05   | 10  |
| PeproTech | MANF           | 450-06   | 100 |
| PeproTech | Midkine (MK)   | 450-16   | 100 |
| PeproTech | Pleiotrophin   | 450-15   | 100 |
| PeproTech | Slit2-N        | 150-11   | 500 |
| PeproTech | APRIL          | 310-10C  | 200 |

|           |                                     |                 |       |
|-----------|-------------------------------------|-----------------|-------|
| PeproTech | BMP-2                               | 120-02          | 100   |
| PeproTech | BMP-4                               | 120-05ET        | 200   |
| PeproTech | BMP-6                               | 120-06          | 300   |
| PeproTech | BMP-7                               | 120-03          | 100   |
| PeproTech | FGF-20                              | 100-41          | 20    |
| PeproTech | G-CSF                               | 300-23          | 100   |
| PeproTech | GDF-7                               | 120-37          | 100   |
| PeproTech | IL-11                               | 200-11          | 100   |
| PeproTech | WNT-1                               | 120-17          | 50    |
| PeproTech | Betacellulin                        | 100-50          | 50    |
| PeproTech | IL-15                               | 200-15          | 100   |
| PeproTech | IL19                                | 200-19          | 100   |
| PeproTech | IL20                                | 200-20          | 200   |
| PeproTech | IL9                                 | 200-09          | 30    |
| PeproTech | KGF                                 | 100-19          | 100   |
| PeproTech | IL17B                               | 200-28          | 100   |
| PeproTech | IL17D                               | 200-27          | 200   |
| PeproTech | IL17E                               | 200-24          | 100   |
| Prestwick | Dexamethasone                       | Prestw-0130     | 392   |
| Prestwick | Riluzole hydrochloride              | Prestw-0167     | 4006  |
| Prestwick | Norethindrone                       | Prestw-0253     | 3999  |
| Prestwick | Clomipramine hydrochloride          | Prestw-0269     | 4005  |
| Prestwick | Clenbuterol hydrochloride           | Prestw-0345     | 4015  |
| Prestwick | Betaxolol hydrochloride             | Prestw-0382     | 3989  |
| Prestwick | Bisacodyl                           | Prestw-0419     | 3975  |
| Prestwick | Cisapride                           | Prestw-0430     | 4007  |
| Prestwick | Digitoxigenin                       | Prestw-0436     | 3970  |
| Prestwick | Progesterone                        | Prestw-0477     | 4025  |
| Prestwick | Serotonin hydrochloride             | Prestw-0481     | 5901  |
| Prestwick | Benperidol                          | Prestw-0484     | 3967  |
| Prestwick | Betahistine mesylate                | Prestw-0543     | 5648  |
| Prestwick | Hexestrol                           | Prestw-0699     | 4001  |
| Prestwick | Tolmetin sodium salt dihydrate      | Prestw-0856     | 3519  |
| Prestwick | Carbachol                           | Prestw-0880     | 3982  |
| Prestwick | Promethazine hydrochloride          | Prestw-0888     | 3979  |
| Prestwick | Nisoxetine hydrochloride            | Prestw-0910     | 3528  |
| Prestwick | Menadione                           | Prestw-NAT-0101 | 3995  |
| Prestwick | Irinotecan hydrochloride trihydrate | Prestw-1494     | 58668 |
| Prestwick | Hydrocotarnine                      | Prestw-NAT-0153 | 3989  |
| Prestwick | Procyclidine hydrochloride          | Prestw-0844     | 3564  |
| Prestwick | Digoxin                             | Prestw-0437     | 4061  |

|           |                                       |              |         |
|-----------|---------------------------------------|--------------|---------|
| Prestwick | Metacycline                           | Prestw-0964  | 3716    |
| Prestwick | Beta-Escin                            | Prestw-0676  | 3620    |
| SantaCruz | Epigallocatechin-3-gallate (EGCG)     | sc-200802    | 45840   |
| SantaCruz | Mepyramine                            | sc-203629    | 2854    |
| SantaCruz | Lovastatin                            | sc-200850    | 3959    |
| SantaCruz | High glucose                          | sc-211203    | 9008000 |
| SantaCruz | Forskolin / Coleonol                  | sc-3562      | 4105    |
| SantaCruz | Staurosporine                         | sc-3510      | 466     |
| Sigma     | PMA (Phorbol 12-myristate 13-acetate) | P1585        | 500     |
| Sigma     | Insulin                               | I9278        | 1000    |
| Sigma     | Formaldehyde                          | 15512        | 150     |
| Sigma     | NaCl                                  | S5886        | 8766000 |
| Sigma     | H <sub>2</sub> O <sub>2</sub>         | H3410        | 17005   |
| VWR       | Dimethyloxalylglycine                 | CAYM71210-10 | 175140  |

**Table S2.** Related to Figures 2-5. Lipid stimuli. Supplier, catalogue numbers and target concentrations are provided.

| Supplier | Stimulus | Cat Number | Target C (μM) |
|----------|----------|------------|---------------|
| BAvanti  | LPA 18:1 | 857130     | 10            |
| Avanti   | LPA 16:0 | 857123     | 10            |
| Avanti   | LPA 20:4 | 857125     | 10            |

**Table S3.** Related to *RNA analysis*. Primers for qPCR of human genes.

| Target Gene   | Forward Primer (5'→3')   | Reverse Primer (5'→3')   |
|---------------|--------------------------|--------------------------|
| <i>B2M</i>    | CTGAAAAAGATGAGTATGCC     | ACCCTACATTTTGTGCATAA     |
| <i>CCL2</i>   | ACAAGCAAACCCAAACTCCG     | AACAGGGTGTCTGGGGAAAG     |
| <i>CCL3</i>   | TTCCGTCACCTGCTCAGAATC    | GTGATGCAGAGAACTGGTTGC    |
| <i>CXCL8</i>  | CACTGCGCCAACACAGAAAT     | TTCTCAGCCCTCTTCAAAAACCTC |
| <i>CXCL10</i> | AGTGGCATTCAAGGAGTACCT    | CGTGGACAAAATTGGCTTGC     |
| <i>ICAM1</i>  | CCTTCCTCACCGTGTACTGG     | AGCGTAGGGTAAGGTTCTTGC    |
| <i>IL6</i>    | AGCCACTCACCTCTTCAGAAC    | GCCTCTTTGCTGCTTTCACAC    |
| <i>LPAR1</i>  | AATCGGGATACCATGATGAGTCTT | GGTGGCGCTCATTTCCTT       |
| <i>LPAR2</i>  | CGCTCAGCCTGGTCAAGACT     | TTGCAGGACTCACAGCCTAAAC   |
| <i>LPAR3</i>  | AGGACACCCATGAAGCTAATGAA  | TGCCATACATGTCCTCGT       |
| <i>LPAR4</i>  | TCTGTTTCCGCATGAAAATGAGA  | TGCAGAGGGTGTACCAAAAAG    |
| <i>LPAR5</i>  | CACTTGGTGGTCTACAGCTTG    | GCGTAGTAGGAGAGACGAACG    |
| <i>LPAR6</i>  | GATTGTTTGCACTGGCGTGT     | AAGCAGGCTTCTGAGGCATT     |
